# Supplementary material for: Electro-oxidation competency of palladium nanocatalysts over ceria–carbon composite supports during alkaline ethylene glycol oxidation
Source: Royal Society of Chemistry journal article supplement (doi:10.1039/c8cy02232a), 2018-12-17
Supplement: c8cy02232a1.pdf [file c8cy02232a1.pdf]

## Electro-oxidation Competency of Palladium Nanocatalysts over Ceria-Carbon Composite Support during Alkaline Ethylene Glycol Oxidation

Sasidharan Sankar<sup>†,‡</sup>, Naoto Watanabe<sup>†</sup>, Gopinathan M. Anilkumar<sup>§,‡</sup>, Balagopal N. Nair<sup>§</sup>,  
Sailaja G. Sivakammiammal<sup>‡</sup>, Takanori Tamaki<sup>†,‡</sup>, Takeo Yamaguchi<sup>†,‡\*</sup>

<sup>†</sup> *Laboratory for Chemistry and Life Sciences,  
Tokyo Institute of Technology, R1-17, 4259 Nagatsuta, Midori-ku, Yokohama 226-850*  
*\*E-mail: [yamag@res.titech.ac.jp](mailto:yamag@res.titech.ac.jp)*

<sup>‡</sup> *Core Research for Evolutionary Science and Technology, Japan Science and  
Technology Agency (JST-CREST), Japan 102-0076*

<sup>§</sup> *R&D Centre, Noritake Co., Ltd., 300 Higashiyama, Miyochi-cho, Miyoshi, Japan 470-0293*

<sup>‡</sup> *Cochin University of Science and Technology, Kochi, India 682022*

**Table S1.** Thermal decomposition data obtained from TGA and the corresponding Pd metal content calculated using ICP

|                                          | <b>Final metal<br/>content from<br/>TGA<br/>(wt%)</b> | <b>Pd content<br/>(from ICP)<br/>(wt %)</b> | <b>CeO<sub>2</sub> content<br/>(wt%)</b> |
|------------------------------------------|-------------------------------------------------------|---------------------------------------------|------------------------------------------|
| <b>Pd/<br/>C- CeO<sub>2</sub> (1:0)</b>  | <b>36</b>                                             | <b>36</b>                                   | <b>0</b>                                 |
| <b>Pd/<br/>C-CeO<sub>2</sub> (1:0.5)</b> | <b>42</b>                                             | <b>24</b>                                   | <b>18</b>                                |
| <b>Pd/<br/>C-CeO<sub>2</sub>(1:1)</b>    | <b>50</b>                                             | <b>27</b>                                   | <b>23</b>                                |
| <b>Pd/<br/>C-CeO<sub>2</sub> (1:2)</b>   | <b>58</b>                                             | <b>20</b>                                   | <b>38</b>                                |

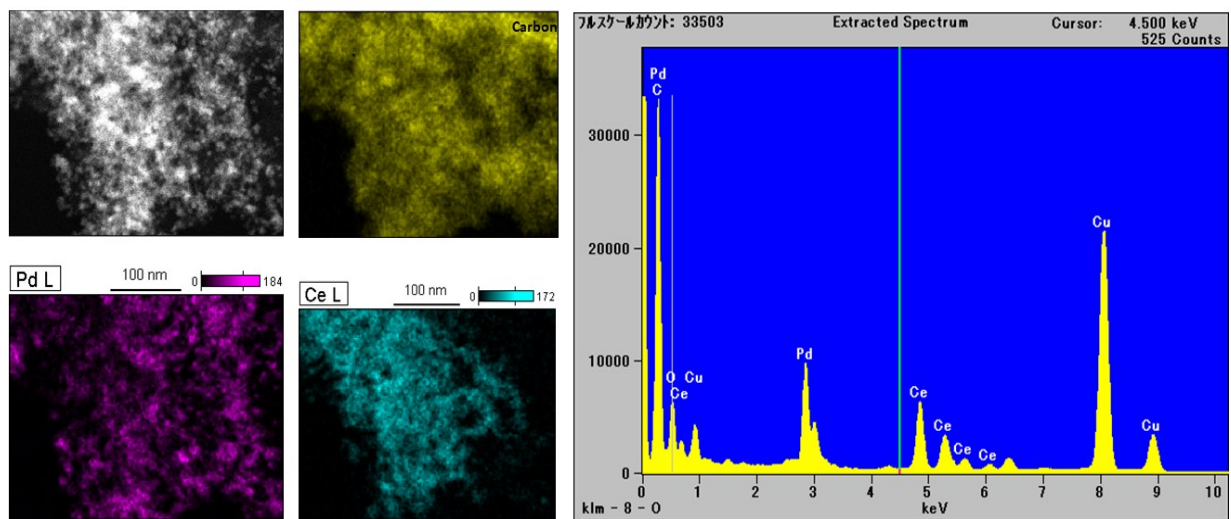

**Figure S1** HR-TEM EDS mapping of Pd/C-CeO<sub>2</sub> (1:1) catalyst and the corresponding EDS spectra recorded

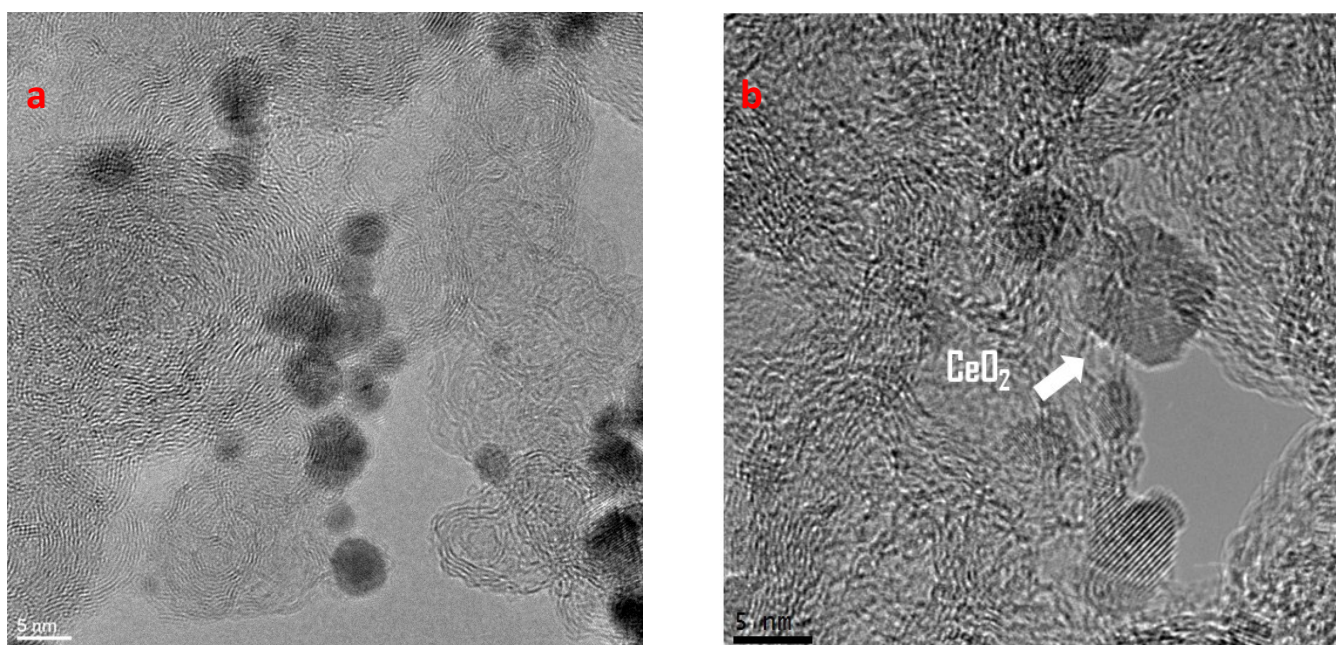

**Figure S2** HR-TEM image of a) Pd/C showing the morphology and size b) C-CeO<sub>2</sub> (1:1) composite support

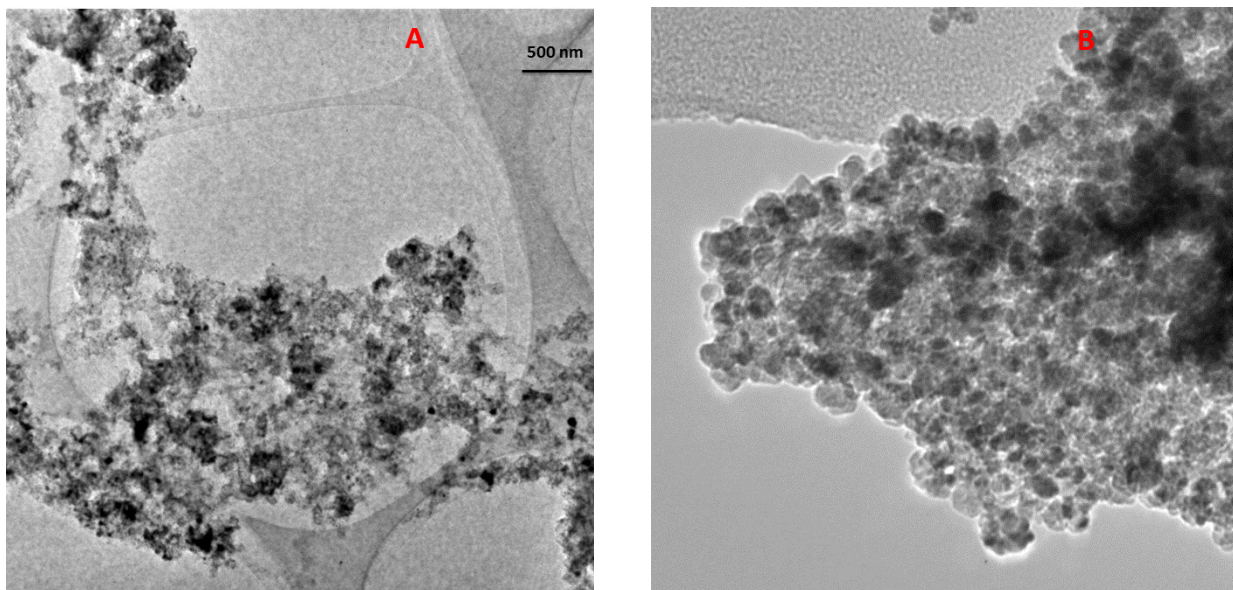

**Figure S3** HR-Transmission electron micrograph of A) Pd/C-CeO<sub>2</sub> (1:1.5) and B) Pd/C-CeO<sub>2</sub> (1:2)

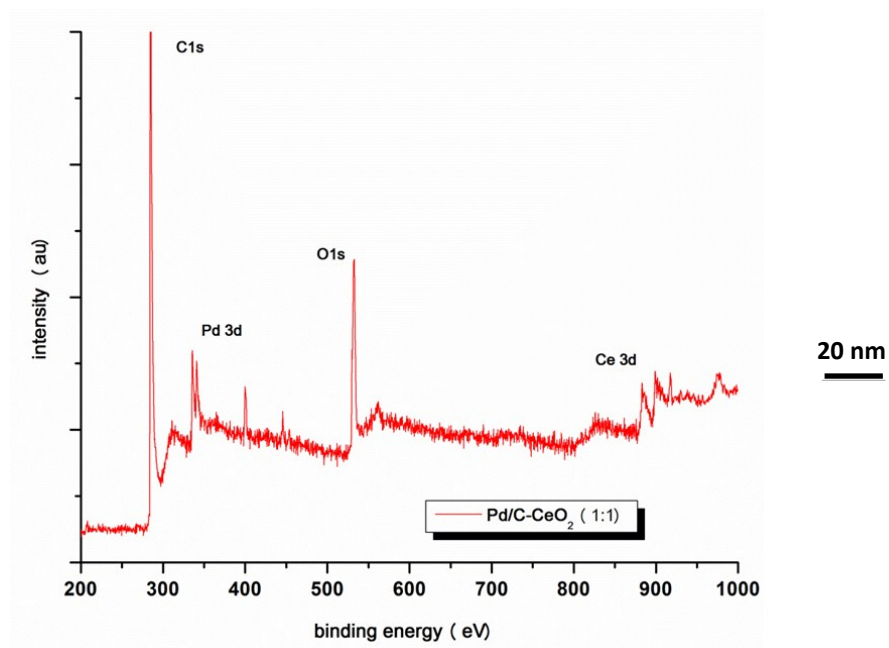

**Figure S4** XPS spectra of Pd/C-CeO<sub>2</sub> (1:1) catalyst showing the binding energies corresponding to Pd and Ce.

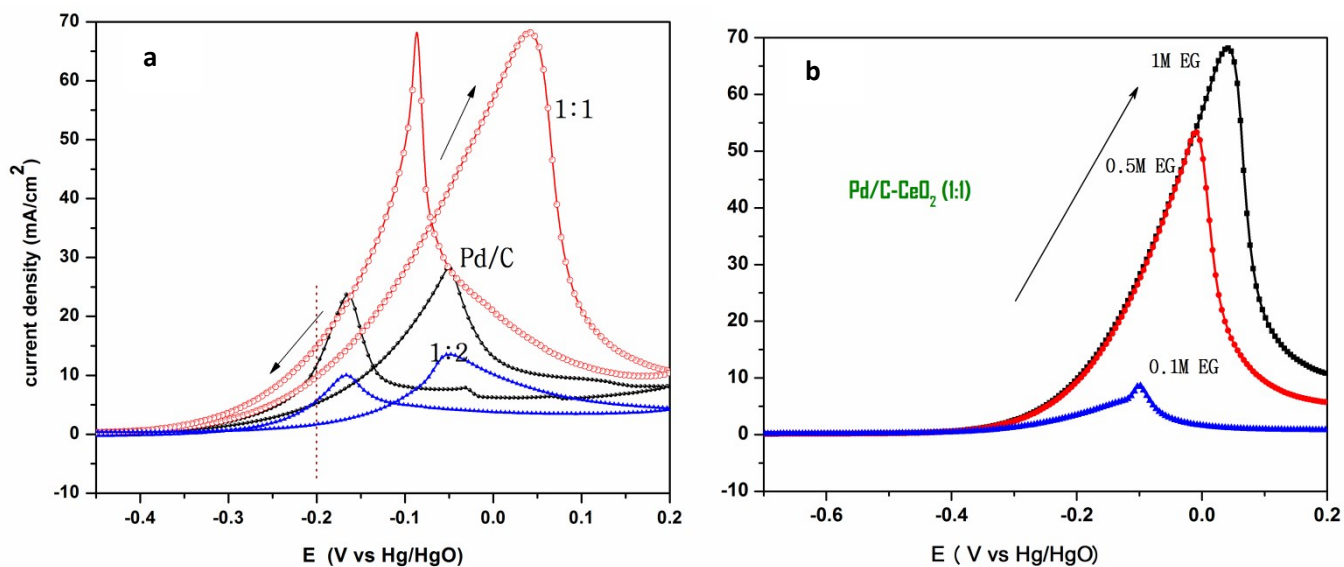

**Figure S5** a) CV forward and backward profiles during Alkaline EGOR for prepared catalysts and b) EGOR with varying concentration for Pd/C-CeO<sub>2</sub> (1:1) catalysts

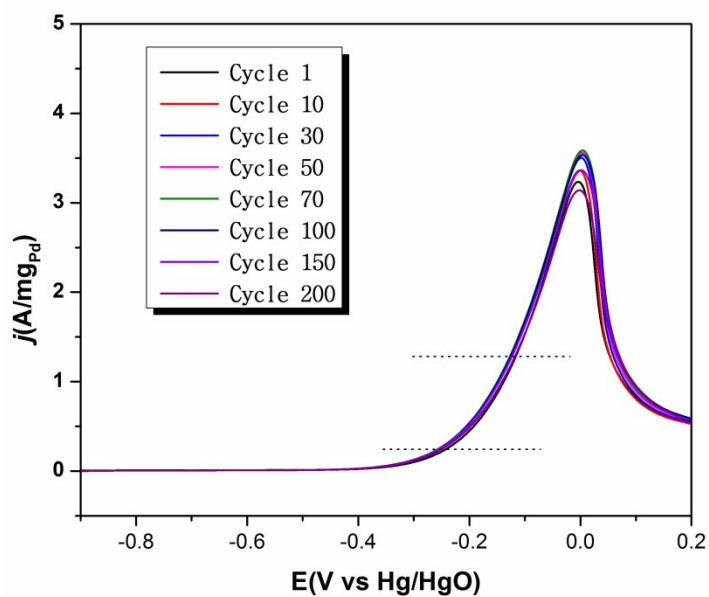

**Figure S6** CV profiles during various cycles of cyclic stability test for Pd/C-CeO<sub>2</sub> (1:1) catalyst

Further, the electrochemical behavior of the catalysts in 0.1M KOH solution the and corresponding EGOR activity was carried out. Pd/C-CeO<sub>2</sub> shows improved EGOR performance compared to Pd/C with negative onset potential and higher current density.

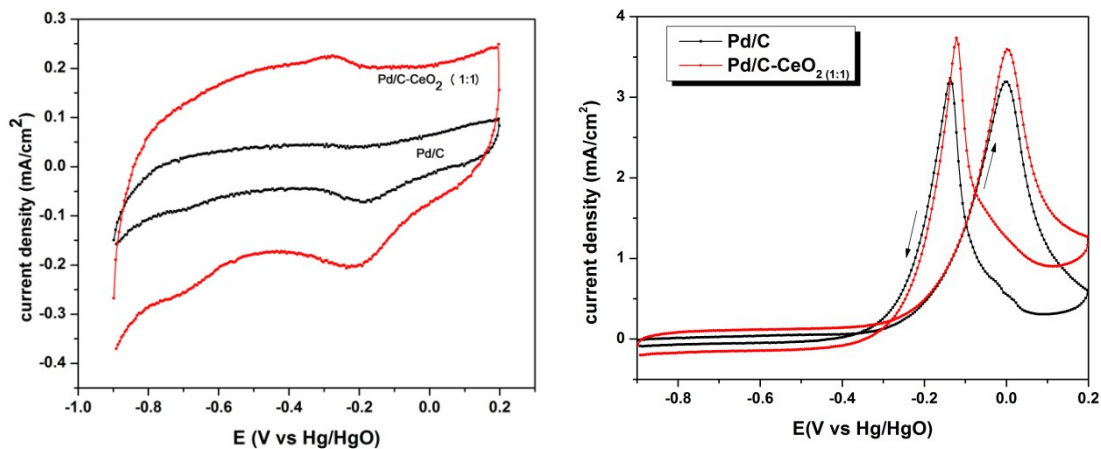

**Figure S7)** CV profiles recorded for Pd/C and Pd/C-CeO<sub>2</sub> samples a) in N<sub>2</sub> saturated 0.1M KOH and b) EGOR activity in N<sub>2</sub> saturated 0.1M KOH+0.5M EG
